# Supplementary material
Source: Springer Nature journal article supplement (https://www.springermedizin.de/resource/supplementary/13046_2011_456_MOESM7_ESM.pdf/9662272)

# CALO

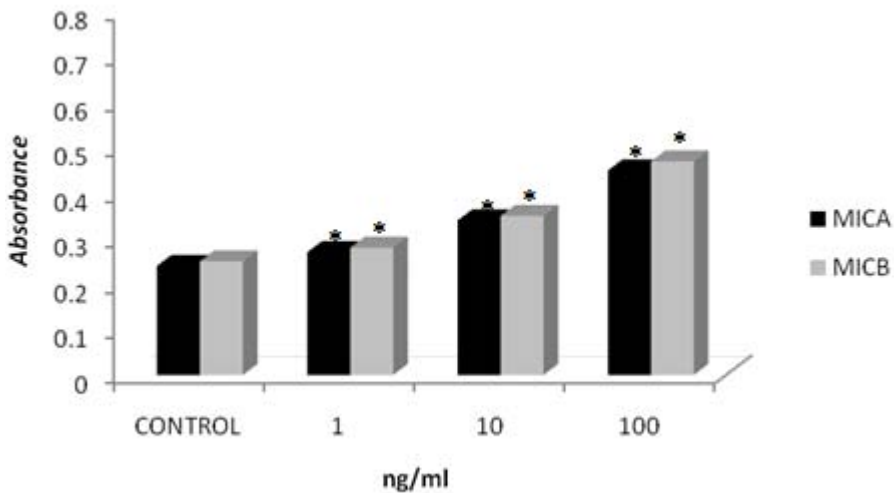

# INBL

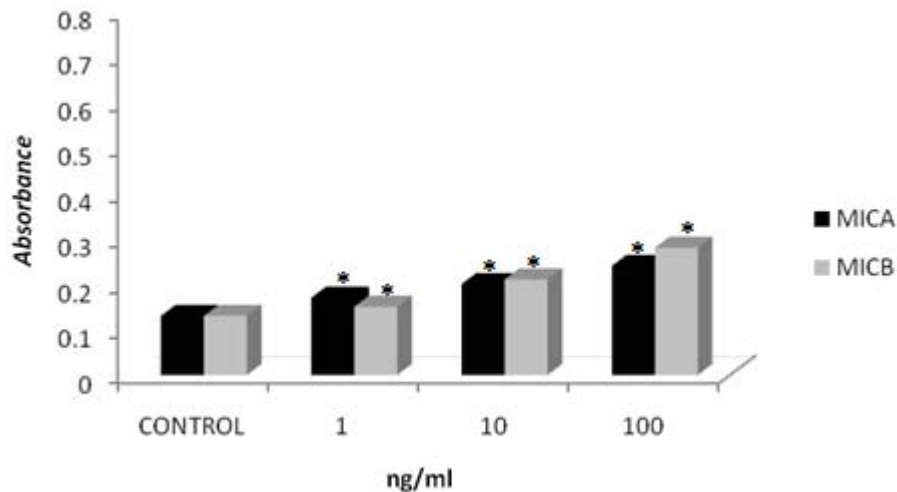

Supplement: MOESM7 [file 9662272]
